# Supplementary material
Source: publisher figshare collection journal article supplement (https://tandf.figshare.com/ndownloader/files/15353876)
Supplement: Supplementary file 1 [file 15353876]

1. Is the intra-uterine copper device (IUB) inserted by your gynecologist at least 12 months ago still in place?

☐ Yes ☐ No

1.1. Date when this IUB was removed

1.2. Reason why this IUB was removed (*tick all that apply*)

- ☐ Spontaneous expulsion  
☐ Heavy menstrual bleeding  
☐ Severe cramps  
☐ Wanted another form of contraception  
☐ Wanted to get pregnant  
☐ Pregnancy  
☐ Other, please specify:

1.3. Did you get pregnant after removal of this IUB?

☐ Yes ☐ No

1.3.1. How long did it take you to become pregnant after removal of this IUB?

☐ Day(s)  
☐ Month(s)

1.3.2. Did you plan to get pregnant?

☐ Yes ☐ No

1.3.3. Did you use a different contraception method after removal of this IUB?

☐ Yes ☐ No

## 2. Menstrual bleeding over the last three months

2.1. Average duration of menstrual bleeding (days)

2.2. Over the past three months, which of the following best describes the blood loss during your periods?

- ☐ Light bleeding - i.e. less than 1 sanitary pad or tampon over 8 hours  
☐ Moderate bleeding - i.e. use of 1 sanitary pad or tampon (or less) over 3 hours  
☐ Heavy bleeding - i.e. Need to change sanitary pad or tampon every 1 to 2 hours

2.3. Over the past three months, which of the following best describes the pain/cramps associated to your periods?

- ☐ No pain or cramps  
☐ Light pain or cramps  
☐ Moderate pain or cramps  
☐ Severe pain or cramps  
☐ Unbearable pain or cramps

2.4. Over the past three months, which of the following best describes your periods?

Pleasant

☐ 1

☐ 2

☐ 3

☐ 4

Acceptable

☐ 5

☐ 6

☐ 7

☐ 8

☐ 9

Unbearable

☐ 10

3. We would like to have your feedback on the following since insertion of the most recent IUB

3.1. How satisfied are you with the IUB?

Very satisfied

☐ 1

☐ 2

☐ 3

☐ 4

Satisfied

☐ 5

☐ 6

☐ 7

☐ 8

☐ 9

Very dissatisfied

☐ 10

3.2. How would you describe your period now compared to before the IUB was inserted?

Much better

☐ 1

☐ 2

☐ 3

☐ 4

Same

☐ 5

☐ 6

☐ 7

☐ 8

☐ 9

Much worse

☐ 10

3.3. Would you recommend this IUB to a friend / close relative?

- ☐ Yes  
☐ No  
☐ Prefer not to answer

Thank you for your time taken to complete this questionnaire.
